# Supplementary material
Source: PubMed Central journal article supplement (PMC4275317)
Supplement: 10-1055-s-0034-1383401-sup_gf865.pdf [file 10-1055-s-0034-1383401-sup_gf865.pdf]

# Evaluation des Therapiemanagements und der Therapieadhärenz bei postmenopausalen Patientinnen mit hormonrezeptorpositivem Mammakarzinom, die mit Letrozol behandelt werden – die EvaluateTM-Studie

Evaluation of Therapy Management and Patient Compliance in Postmenopausal Patients with Hormone Receptor-positive Breast Cancer Receiving Letrozole Treatment: The EvaluateTM Study

## Autoren

P. A. Fasching<sup>1</sup>, T. Fehm<sup>2,41</sup>, S. Kellner<sup>1</sup>, J. de Waal<sup>3</sup>, M. Rezai<sup>4</sup>, B. Baier<sup>3</sup>, G. Baake<sup>5</sup>, H.-C. Kolberg<sup>6</sup>, M. Guggenberger<sup>7</sup>, M. Warm<sup>8,9</sup>, N. Harbeck<sup>8,10</sup>, R. Würstlein<sup>8,10</sup>, J.-U. Deuker<sup>11</sup>, P. Dall<sup>12</sup>, B. Richter<sup>13</sup>, G. Wachsmann<sup>14</sup>, C. Brucker<sup>15</sup>, J. W. Siebers<sup>16</sup>, N. Fersis<sup>17</sup>, T. Kuhn<sup>18</sup>, C. Wolf<sup>19</sup>, H.-W. Vollert<sup>20</sup>, G.-P. Breitbach<sup>21</sup>, W. Janni<sup>22</sup>, R. Landthaler<sup>23</sup>, A. Kohls<sup>24</sup>, D. Rezek<sup>25</sup>, T. Noesslet<sup>26</sup>, G. Fischer<sup>27</sup>, S. Henschen<sup>28</sup>, T. Praetzel<sup>29</sup>, V. Heyl<sup>30</sup>, T. Kühn<sup>31</sup>, T. Krauß<sup>32</sup>, C. Thomssen<sup>33</sup>, S. Kümmel<sup>34</sup>, A. Hohn<sup>35</sup>, H. Tesch<sup>36</sup>, C. Mundhenke<sup>37</sup>, A. Hein<sup>1</sup>, C. Rauh<sup>1</sup>, C. M. Bayer<sup>1</sup>, A. Jacob<sup>38</sup>, K. Schmidt<sup>38</sup>, E. Belleville<sup>39</sup>, P. Hadji<sup>40</sup>, D. Wallwiener<sup>41</sup>, E.-M. Grischke<sup>41</sup>, M. W. Beckmann<sup>1</sup>, S. Y. Brucker<sup>41</sup>

## Institute

Die Institutsangaben sind am Ende des Beitrags gelistet.

## Schlüsselwörter

- Brustkrebs
- Aromataseinhibitor
- Compliance
- endokrine Therapie

## Key words

- breast cancer
- aromatase inhibitor
- compliance
- endocrine therapy

## Zusammenfassung

**Einleitung:** Die EvaluateTM-Studie (Evaluation of therapy management and patient compliance in postmenopausal hormone receptor positive breast cancer patients receiving letrozole treatment) ist eine prospektive, nicht interventionelle Studie, die das Therapiemanagement und die Compliance im Rahmen der Routineversorgung unter einer Therapie mit Letrozol bei postmenopausalen Patientinnen mit einem invasiven, hormonrezeptorpositiven Mammakarzinom als Studienziel hatte. In dieser Publikation werden die Parameter bei Studieneinschluss berichtet.

**Material und Methoden:** Von Januar 2008 bis Dezember 2009 wurden insges. 5045 Patientinnen in 310 Prüfzentren in die EvaluateTM-Studie eingeschlossen. Zugelassen waren Patientinnen mit einem hormonrezeptorpositiven Mammakarzinom in der adjuvanten und metastasierten Therapiesituation. 373 Patientinnen mussten aus unterschiedlichen Gründen aus den Analysen ausgeschlossen werden.

**Ergebnisse:** Insgesamt wurden 4420 Patientinnen in der adjuvanten und 252 Patientinnen in der palliativen (metastasierten) Situation in die Studie eingeschlossen. Bei 4181 Patientinnen in der adjuvanten Situation wurde direkt nach operativer Therapie mit einer Aromataseinhibitortherapie mit Letrozol begonnen (upfront). Bei 200 Patientinnen wurde zunächst Tamoxifen gegeben und in den Jahren 2–5 nach Diagnosestellung mit der Aromatasehemmertherapie mit Letrozol begonnen (switch), und bei 39 Patientinnen erst 6–10 Jahren nach Diagnosestellung (extended endocrine therapy). Die Patientinnen- und Tumorcharakteristika lagen ebenso wie die Begleiterkrankungen und die Begleitmedikation im Bereich des Erwarteten.

**Schlussfolgerung:** Die Daten der EvaluateTM-Studie werden einen guten Einblick in das Thera-

## Abstract

**Introduction:** The EvaluateTM study (Evaluation of therapy management and patient compliance in postmenopausal hormone receptor-positive breast cancer patients receiving letrozole treatment) is a prospective, non-interventional study for the assessment of therapy management and compliance in the routine care of postmenopausal women with invasive hormone receptor-positive breast cancer receiving letrozole. The parameters for inclusion in the study are presented and discussed here.

**Material and Methods:** Between January 2008 and December 2009 a total of 5045 patients in 310 study centers were recruited to the EvaluateTM study. Inclusion criteria were hormone receptor-positive breast cancer and adjuvant treatment or metastasis. 373 patients were excluded from the analysis for various reasons.

**Results:** A total of 4420 patients receiving adjuvant treatment and 252 patients with metastasis receiving palliative treatment were included in the study. For 4181 patients receiving adjuvant treatment, treatment with the aromatase inhibitor letrozole commenced immediately after surgery (upfront). Two hundred patients had initially received tamoxifen and started aromatase inhibitor treatment with letrozole at 1–5 years after diagnosis (switch), and 39 patients only commenced letrozole treatment 5–10 years after diagnosis (extended endocrine therapy). Patient and tumor characteristics were within expected ranges, as were comorbidities and concurrent medication.

**Conclusion:** The data from the EvaluateTM study will offer a good overview of therapy management in the routine care of postmenopausal women with hormone receptor-positive breast cancer. Planned analyses will look at therapy compliance and patient satisfaction with how in-

eingereicht 6. 11. 2014  
revidiert 17. 11. 2014  
akzeptiert 18. 11. 2014

## Bibliografie

DOI <http://dx.doi.org/10.1055/s-0034-1383401>  
Geburtsh Frauenheilk 2014; 74:  
1–7 © Georg Thieme Verlag KG  
Stuttgart · New York ·  
ISSN 0016-5751

## Korrespondenzadresse

Prof. Peter A. Fasching, MD  
University Hospital Erlangen  
Department of Gynecology  
and Obstetrics  
Universitätsstraße 21–23  
91054 Erlangen  
[peter.fasching@uk-erlangen.de](mailto:peter.fasching@uk-erlangen.de)

piemanagement von postmenopausalen Patientinnen mit einem hormonrezeptorpositiven Mammakarzinom im Rahmen der Routineversorgung geben. Geplante Analysen beinhalten die Therapiepersistenz und die Zufriedenheit mit den Informationsstrukturen und dem Aufklärungsinhalt.

## Einleitung

▼ In den letzten Jahren hat sich die Behandlung des Mammakarzinoms deutlich in Richtung einer individualisierten Therapie entwickelt. Das molekulare Verständnis des Mammakarzinoms und die Entwicklung von Biomarkern haben dazu beigetragen, dass die Patientinnen, wenn möglich, eine Therapie erhalten, die eine möglichst hohe Effektivität bei möglichst niedrigen Nebenwirkungsraten beinhaltet [1–4]. Hierbei stehen derzeit oft Karzinome wie das triple-negative Mammakarzinom oder das HER2-positive Mammakarzinom im Blickpunkt des Interesses, nicht zuletzt wegen deutlicher Therapieeffekte und Weiterentwicklungen. Jedoch hat der größte Teil der 72 000 Patientinnen, die jedes Jahr in Deutschland erkranken [5], ein hormonrezeptorpositives Mammakarzinom. Insbesondere für diese Patientinnen sind in den letzten Jahrzehnten individualisierte Therapiefortschritte erzielt worden, zunächst durch den Einsatz von Tamoxifen und dann durch die Einführung der Aromatasehemmer. Die Einführung der Aromatasehemmer in die adjuvante Behandlung des hormonrezeptorpositiven Mammakarzinoms bei postmenopausalen Patientinnen hat die Behandlung im großen Stil verändert. Während alle Studien nachweisen konnten, dass das rezidivfreie Überleben im Vergleich zu einer alleinigen Behandlung mit Tamoxifen verbessert werden konnte, zeigten nur einige Studien, dass auch das Gesamtüberleben verbessert werden kann [6–13]. Zum Zeitpunkt der Zulassung wurde das Verhältnis zwischen Nutzen und Risiko der Behandlung eindeutig zugunsten des Nutzens beurteilt und es folgte eine breite Einführung der Aromatasehemmer in die Therapiepraxis des hormonrezeptorpositiven Mammakarzinoms bei postmenopausalen Patientinnen. Die relative Risikoreduktion für das rezidivfreie Überleben wurde in den Studien, in denen 5 Jahre Tamoxifen mit 5 Jahren Aromatasehemmer verglichen wurden, mit ca. 20% angegeben (ATAC und BIG 1-98) und lag bei ca. 32–38% bei den Studien, die 5 Jahre Tamoxifen mit einer Sequenz aus 2 Jahren Tamoxifen, gefolgt von 3 Jahren Aromatasehemmer verglichen hatten (ABCSG8, ARNO, IES-031). Auch in der sogenannten erweiterten adjuvanten Situation (Therapie in den Jahren 6–10 nach Diagnosestellung und nach 5 Jahren einer Tamoxifentherapie konnten Verbesserungen des krankheitsfreien Überlebens nachgewiesen werden [14–16]. Bei den Nebenwirkungen standen menopausale Beschwerden im Mittelpunkt des Interesses, weil sie Patientinnen und Ärzte in der klinischen Praxis gleichermaßen beschäftigten und Zusatzmedikationen, einen antihormonellen Therapiewechsel oder sogar einen Therapieabbruch erforderlich machten. Es wird jedoch davon ausgegangen, dass eine mind. 5-jährige Einnahme der Medikation notwendig ist, um einen ähnlichen Therapieeffekt wie in den klinischen Studien zu erreichen [17]. Nicht alle Patientinnen nehmen die erforderliche Dosis und nicht alle Patientinnen nehmen die Therapie über mind. 5 Jahre ein [18–21], was als fehlende Therapieadhärenz oder als Non-Compliance bezeichnet wird. Auch wenn die adjuvante, antihormonelle Therapie des Mammakarzinoms mit einer hohen Rate von Patientinnen mit fehlender Therapieadhärenz assoziiert zu sein scheint, sind auch andere Therapien wie die Chemotherapie und die Bestrahlung, ebenso

formation is conveyed and the contents of the conveyed information.

wie die Nachsorge mit einer relevanten Non-Compliance assoziiert [22, 23].

Für Letrozol liegen bislang keine Daten aus großen, prospektiven Studien vor. Ebenso ist wenig bekannt, welche Prädiktoren eine Non-Compliance vorhersagen, um eventuelle Risikogruppen für ein solches Verhalten zu Beginn einer Therapie identifizieren zu können.

Um in diesem Zusammenhang Daten zu generieren, führten wir die EvaluateTM-Studie (Evaluation des Letrozol-Therapiemanagements des primären, hormonrezeptorpositiven Mammakarzinoms) durch.

Ziel der EvaluateTM-Studie war es, die Rate an postmenopausalen Patientinnen, die eine Therapie mit Letrozol zur Behandlung des hormonrezeptorpositiven Mammakarzinoms im Rahmen der Routineversorgung innerhalb eines Jahres abbrechen, zu bestimmen. Weitere Studienziele waren die Identifikation von Prädiktoren zum frühen Erkennen solcher Patientinnen, sowie die Erfassung und Bewertung der damit verbundenen Informations- und Aufklärungsmaßnahmen. In dieser Publikation beschreiben wir zunächst die Patientinnen- und Tumorcharakteristika einschließlich relevanter Komorbiditäten sowie die Einflussgrößen auf die Therapieentscheidung.

## Methoden

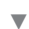

### Studiendesign

Die EvaluateTM-Studie ist eine prospektive, einarmige, nicht interventionelle Studie, in die alle Patientinnen mit einem invasiven Mammakarzinom eingeschlossen werden konnten, die eine Indikation für eine Therapie mit dem Aromatasehemmer Letrozol hatten. Dies beinhaltete Patientinnen in der adjuvanten Situation als 1. Therapie (upfront), im Verlauf nach Tamoxifen (switch), nach 5 Jahren einer antihormonellen Therapie (extended) Therapie und zur Behandlung einer fortgeschrittenen und metastasierten Erkrankung.

Ziele der Studie waren die Evaluation von Einflussfaktoren zur Therapieentscheidung bei Arzt und Patientin in der routinemäßigen Praxis, die Evaluation und Bewertung des Therapiemanagements durch die Patientin, die Evaluation der Patientinnen-Compliance anhand eines Patientinnenfragebogens und der Beurteilung der Compliance durch den behandelnden Arzt, die Wirksamkeit und Verträglichkeit in der Beurteilung durch den Arzt und das Auftreten von unerwünschten Ereignissen unter der Behandlung mit Letrozol.

Alle für die Studienzentren zuständigen Ethikkommissionen genehmigten die Studie. Die federführende Ethikkommission war die Ethikkommission der Medizinischen Fakultät der Universität Erlangen-Nürnberg. Alle Patientinnen gaben ihr schriftliches Einverständnis zur Teilnahme an der Studie.

### Dokumentation

Teilnehmende Patientinnen und Ärzte füllten zu Studienbeginn, nach 6 Monaten und nach 12 Monaten vordefinierte Fragebögen aus (● Abb. 1). Bei Studieneinschluss wurden durch den Arzt/die

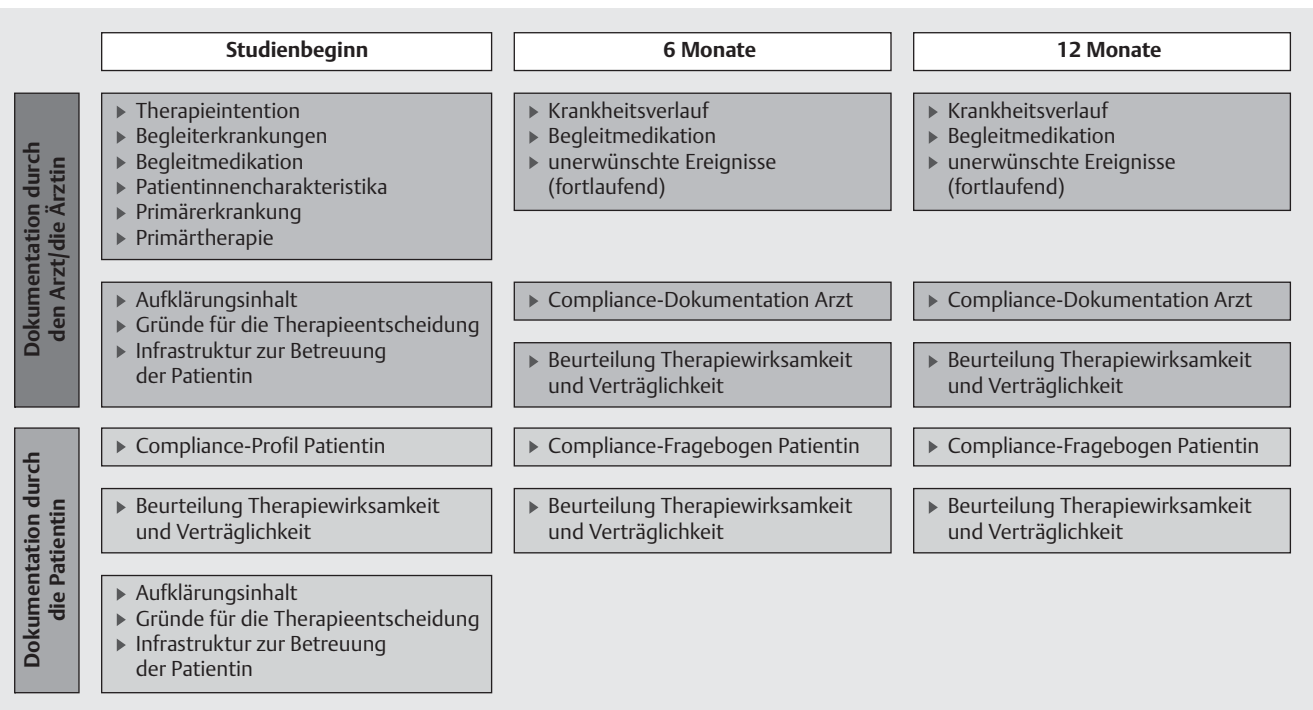

Abb. 1 Flow-Chart der Studie. Es wird gezeigt, zu welchen Zeitpunkten welche Parameter erhoben wurden.

Ärztin die Krankengeschichte, Angaben zur Brustkrebserkrankung und Vorbehandlungen, Begleitmedikation und Begleiterkrankungen dokumentiert. Ebenso wurde der Gesundheitszustand der Patientin beurteilt und Angaben über den Aufklärungsinhalt der Aromatasehemmertherapie, Gründe für die Therapieentscheidung und Angaben über die Betreuungsstruktur der Patientin während der Letrozoltherapie dokumentiert. Im Studienverlauf wurden ein Krankheitsprogress, Therapie-Compliance, das eventuelle Abbruchdatum der Therapie mit Grund und Nebenwirkungen der Therapie erfasst. Die Patientin wurde bei Studieneinschluss zum Aufklärungsinhalt und der Zufriedenheit mit der Aufklärung befragt, ebenso wie nach Informationsquellen zur Aromatasehemmertherapie. Des Weiteren sollten die Patientinnen Angaben über ihr allgemeines Compliance-Verhalten machen. Im Studienverlauf wurde die Patientin gefragt, wie adhären sie sich zu der Therapie verhalten hat und wie das Medikament hinsichtlich Verträglichkeit und Effektivität beurteilt wurde. Die Dokumentation erfolgte auf Fragebögen und letztendlich in einem elektronischen Dokumentationssystem.

### Studienzentren und Patientinnenpopulation

Von Januar 2008 bis Dezember 2009 wurden insges. 5045 Patientinnen in 310 Studienzentren in Deutschland eingeschlossen. Die Zahl der Patientinnen, die pro Zentrum eingeschlossen wurden, reichte von 1 bis 213 und betrug im Median 12.

Von den 5045 Patientinnen wurden 370 ausgeschlossen, weil Angaben über Erkrankungsdatum, Therapiebeginn oder Therapieintention unvollständig waren. Drei weitere Patientinnen wurden ausgeschlossen, weil sie ein hormonrezeptornegatives Mammakarzinom hatten. Somit betrug die Zahl der Patientinnen, die hier ausgewertet werden konnten, 4672.

### Statistische Analyse

Die hier vorgestellten Daten sollen die Patientinnenpopulation und die bei Studieneinschluss erhobenen Patientinnencharakteristika beschreiben. Des Weiteren soll untersucht werden, welcher Zusammenhang zwischen vom Arzt genannten Faktoren, die bei der Entscheidung zu einer Therapie mit Letrozol eine Rolle spielen, und den verschiedenen Patientinnengruppen besteht. Patientinnengruppen wurden wie folgt definiert. Gruppe 1 (adjuvant upfront): Patientinnen, denen Letrozol in adjuvanter Intention und innerhalb eines Jahres nach Diagnosestellung verordnet wurde. Gruppe 2 (adjuvant Jahr 2–5): Patientinnen, denen in den Jahren 2–5 nach der Diagnose in adjuvanter Intention Letrozol verordnet wurde, Gruppe 3: Patientinnen, denen in den Jahren 6–10 nach der Diagnose Letrozol in adjuvanter Intention verordnet wurde, und Gruppe 4: Patientinnen, denen in palliativer Intention Letrozol verordnet wurde (metastasierte Patientinnen). Die Angaben über Faktoren, welche die Ärzte bei der Therapieentscheidung in Betracht gezogen haben, lagen als dichotome Variablen vor. Die Assoziation zwischen beiden Variablen wurde mit dem Chi-Quadrat-Test durchgeführt. P-Werte < 0,05 wurden als signifikant erachtet. Statistische Analysen wurden mit IBM SPSS Statistics Version 21 durchgeführt.

### Ergebnisse

Die in die Studie eingeschlossenen Patientinnen waren im Durchschnitt 64,8 (± 8,5) Jahre alt. Die meisten Patientinnen wurden im Rahmen ihrer adjuvanten Therapie eingeschlossen (n = 4420 von 4672). Insgesamt 252 Patientinnen waren beim Studieneinschluss metastasiert. Von den adjuvanten Patientinnen befanden sich die allermeisten (n = 4181, 94,6%) innerhalb eines Jahres nach Diagnosestellung in Therapie, 200 Patientinnen begannen die Therapie im Jahr 2–5 nach der Diagnose und 39 im Jahr 6–10.

**Tab. 1** Verteilung der Patientinnen auf die verschiedenen Therapiesituationen (Gesamt n = 4672).

| Patientinnengruppe                                                       | n (% der gesamten Population) | Jahre Therapiebeginn nach Diagnose (Median) | Alter (Mittelwert ± Standardabweichung) | ECOG 0 oder 1 n (% innerhalb dieser Subgruppe) |
|--------------------------------------------------------------------------|-------------------------------|---------------------------------------------|-----------------------------------------|------------------------------------------------|
| adjuvant, Beginn der Therapie innerhalb eines Jahres nach der Diagnose   | 4 181 (89,5)                  | 0,20                                        | 65,0 (± 8,4)                            | 4 018 (96,3)                                   |
| adjuvant, Beginn der Therapie innerhalb der Jahre 2–5 nach der Diagnose  | 200 (4,3)                     | 2,32                                        | 61,5 (± 9,3)                            | 198 (99,5)                                     |
| adjuvant, Beginn der Therapie innerhalb der Jahre 6–10 nach der Diagnose | 39 (0,8)                      | 6,03                                        | 60,2 (± 10,2)                           | 36 (92,3)                                      |
| metastasiert                                                             | 252 (5,4)                     | 0,49                                        | 66,1 (± 11,1)                           | 217 (86,1)                                     |

**Tab. 2** Patientinnen und Tumorcharakteristika für die Patientinnen in der adjuvanten Situation (n = 4420).

| Patientencharakteristikum        | n oder Mittelwert | % oder SD |
|----------------------------------|-------------------|-----------|
| Alter                            | 64,8              | ± 8,5     |
| BMI                              | 27,4              | ± 5,2     |
| pT                               |                   |           |
| ▶ 0/is*                          | 20                | 0,4       |
| ▶ 1                              | 2 556             | 58,1      |
| ▶ 2                              | 1 517             | 34,5      |
| ▶ 3                              | 185               | 4,2       |
| ▶ 4                              | 123               | 2,8       |
| ▶ fehlend                        | 19                |           |
| pN                               |                   |           |
| ▶ 0                              | 2 801             | 65,5      |
| ▶ 1                              | 969               | 22,6      |
| ▶ 2                              | 314               | 7,3       |
| ▶ 3                              | 195               | 4,6       |
| ▶ fehlend                        | 141               |           |
| Grading                          |                   |           |
| ▶ 1                              | 652               | 14,9      |
| ▶ 2                              | 3 014             | 68,7      |
| ▶ 3                              | 722               | 16,5      |
| ▶ fehlend                        | 32                |           |
| HER2                             |                   |           |
| ▶ negativ                        | 3 803             | 86,8      |
| ▶ positiv                        | 577               | 13,2      |
| ▶ fehlend                        | 40                |           |
| (neo-)adjuvante Chemotherapie    |                   |           |
| ▶ nein                           | 2 743             | 37,9      |
| ▶ ja                             | 1 676             | 62,1      |
| ▶ fehlend                        | 1                 |           |
| adjuvante Radiatio abgeschlossen |                   |           |
| ▶ nein                           | 2 416             | 54,7      |
| ▶ ja                             | 2 003             | 45,3      |
| ▶ fehlend                        | 1                 |           |
| Trastuzumabtherapie begonnen     |                   |           |
| ▶ nein                           | 4 270             | 96,6      |
| ▶ ja                             | 149               | 3,4       |
| ▶ fehlend                        | 1                 |           |

\* nach neoadjuvanter Chemotherapie

Die medianen Zeiten von Diagnose bis Therapiebeginn waren für die genannten Gruppen 0,2 Jahre, 2,3 Jahre, 6,0 Jahre und 0,5 Jahre (● **Tab. 1**). Erwartungsgemäß war der Anteil der Patientinnen mit ECOG 0 oder 1 in der Gruppe der metastasierten am niedrigsten (86,1%). In der Gruppe der Upfront behandelten Patientinnen lag dieser Anteil bei 96,3%. Somit war der Allgemeinzustand aller eingeschlossenen Patientinnen sehr gut.

**Tab. 3** Begleiterkrankungen Gesamtzahl (n = 4672).

| Krankheitsgruppe                           | n     | %    |
|--------------------------------------------|-------|------|
| Gefäßerkrankungen*                         | 1 968 | 42,1 |
| metabolische Erkrankungen                  | 691   | 14,8 |
| endokrine Erkrankungen                     | 640   | 13,7 |
| muskuloskeletale Erkrankungen              | 422   | 9,0  |
| kardiale Erkrankungen                      | 395   | 8,5  |
| Zustand nach Operation                     | 300   | 6,4  |
| andere maligne Erkrankungen                | 211   | 4,5  |
| respiratorische und pulmonale Erkrankungen | 226   | 4,8  |
| psychiatrische Erkrankungen                | 216   | 4,6  |
| neurologische Erkrankungen                 | 216   | 4,6  |
| gastrointestinale Erkrankungen             | 140   | 3,0  |
| Erkrankungen des Auges                     | 90    | 1,9  |
| renale und urologische Erkrankungen        | 71    | 1,5  |
| Infektionen                                | 69    | 1,5  |
| andere Erkrankungen                        | 317   | 6,8  |

\* einschließlich Hypertonus

Für die adjuvant behandelten Patientinnen sind die Patientinnencharakteristika in ● **Tab. 2** dargestellt. Die meisten Patientinnen hatten einen Tumor im Stadium pT1 (58,1%) und waren nodalnegativ (65,5%). Ein Grading von 2 lag in 68,7% der Fälle und ein positiver HER2-Status in 13,2% der Fälle vor. Die Therapieangaben im Rahmen der Studie lagen ebenfalls im erwarteten Bereich (● **Tab. 2**).

In dieser postmenopausalen Kohorte wurde für mehr als die Hälfte aller Patientinnen eine Begleiterkrankung berichtet. Bei ca. 42% lag eine Gefäßerkrankung (meistens Hypertonus) und bei ca. 15% eine metabolische Erkrankung (am häufigsten ein Diabetes Typ II) vor. Am dritthäufigsten wurden Schilddrüsenerkrankungen angegeben (13,7%). Insbesondere für die Behandlung mit Aromatasehemmern war wichtig, dass 9% vorbekannte muskuloskeletale Erkrankungen angegeben wurden (● **Tab. 3**). Korrespondierend zu den Begleiterkrankungen fiel das Profil der eingenommenen Medikamente aus. Medikamente für Gefäßerkrankungen wurden von 1 714 Patientinnen (36,7%) eingenommen. Von der Gesamtpopulation waren dies 23,9%, die Renin-Angiotensin-Medikamente, 21,5%, die Betablocker und 6,6%, die Kalziumantagonisten eingenommen hatten. Ungefähr 10% der Patientinnen nahmen analgetische Medikamente zu sich, die sich auf orale Analgetika, topische Analgetika und antiinflammatorische und antirheumatische Medikamente so wie in ● **Tab. 4** angegeben verteilten.

Welche Entscheidungskriterien von den Ärzten bei einer Entscheidung für eine Aromatasehemmertherapie in Betracht gezo-

**Tab. 4** Begleitmedikationen bei Studienbeginn.

| Medikation                                           | n     | %    |
|------------------------------------------------------|-------|------|
| Renin-Angiotensin-Medikation                         | 1 115 | 23,9 |
| Betablocker                                          | 1 004 | 21,5 |
| Schilddrüsenmedikation                               | 693   | 14,8 |
| Anthithrombosemedikation                             | 418   | 8,9  |
| Lipidmedikation                                      | 394   | 8,4  |
| Analgetika                                           | 363   | 7,8  |
| topische Analgetika                                  | 362   | 7,7  |
| Diuretika                                            | 355   | 7,6  |
| Mundspülungen                                        | 328   | 7,0  |
| Kalziumantagonisten                                  | 307   | 6,6  |
| Antidiabetika                                        | 284   | 6,1  |
| Antiazida                                            | 262   | 5,6  |
| Ophthalmologika                                      | 231   | 4,9  |
| Psychoanaleptika                                     | 213   | 4,6  |
| Mineralien (Nahrungsergänzung)                       | 160   | 3,4  |
| Medikation zur Behandlung von kardialen Erkrankungen | 153   | 3,3  |
| Psycholeptika                                        | 133   | 2,8  |
| antiinflammatorische Medikamente                     | 121   | 2,6  |
| Behandlung obstruktiver Lungenerkrankungen           | 114   | 2,4  |
| alle anderen Medikamente                             | 786   | 16,8 |

gen wurden, ist in **Tab. 5** dargestellt. Der Hormonrezeptorstatus war erwartungsgemäß der wichtigste Faktor. Der Anteil von 76% der Ärzte, die sich auf eine Tumorboardentscheidung berufen, spiegelt die Strukturen der Entscheidungsfindung in Brustzentren wider. Betrachtet man Unterschiede der Einflussfaktoren in den verschiedenen Patientinnengruppen, so sind alle Entscheidungsfaktoren unterschiedlich häufig von den Patientinnengruppen genannt worden, außer die Art der Voroperation und die Miteinbindung der Patientinnen bei der Entscheidungsfindung. Diese Faktoren waren in allen Gruppen gleich wichtig. (**Tab. 5**). Das Tumorstadium war bei der Entscheidungsfindung für die Upfront-Therapie häufiger genannt worden (62,6%) als in den anderen Gruppen (57,5%/53,8%/53,6%). Ebenso scheinen das Alter und der HER2-Status bei der Entscheidung für eine Upfront-Therapie ebenfalls wichtiger zu sein, während vorausgegangene Chemotherapien bei den metastasierten Patientinnen häufiger zu einer Entscheidungsfindung herangezogen wurden.

## Diskussion

In einem Zeitraum von 2 Jahren konnten mehr als 5000 Patientinnen in mehr als 300 Studienzentren in die EvaluateTM-Studie eingeschlossen werden. Studienziele waren die Analyse von Einflussfaktoren der Therapieentscheidung und Identifikation von Prädiktoren der Therapie-Compliance. Erwartungsgemäß wurden die meisten Patientinnen in der sogenannten Upfront-Situation eingeschlossen und nur wenige Patientinnen in der erweiterten adjuvanten Situation und der metastasierten Situation. Die übrigen Patientinnencharakteristika lagen im Bereich des Erwarteten. Beim Vergleich der Faktoren, die der Arzt zur Therapieentscheidung herangezogen hatte, wurden ebenfalls erwartete Unterschiede zwischen den Patientinnengruppen gesehen.

Die EvaluateTM-Studie ist eine von 3 prospektiven Studien mit einer großen Patientinnenzahl, die sich mit der Compliance unter einer Aromatasehemmertherapie beschäftigt.

Die PACT-Studie (Patient's Anastrozole Compliance to Therapy) war eine prospektiv randomisierte Studie, die ebenfalls ca. 5000 Patientinnen eingeschlossen hatte [24]. In dieser Studie wurde eine Randomisierung durchgeführt, welche die Patientinnen in eine Gruppe einteilte, die regelmäßig im 1. Jahr Informationen über die Erkrankung und die Antihormontherapie erhalten hatte, und eine Gruppe, die diese Informationen nicht regelmäßig erhalten hatte. Diese Studienpopulation in der adjuvanten Situation war der der EvaluateTM-Studie sehr ähnlich [24]. Die Randomisierung wurde in der PACT-Studie im Hinblick auf die Compliance untersucht. Die Compliance war definiert als der Anteil der Patientinnen, die nach einem Jahr angaben, fast immer oder immer die Medikation von Anastrozol eingenommen zu haben. Die Compliance lag im Interventionsarm bei 88,8% und im Standardarm bei 88,5% [20]. Als Einflussfaktoren in einer multivariaten Analyse wurden aber Teilnahme an Rehabilitationsprogrammen, Arbeitsstatus, regelmäßige Teilnahme an der Nachsorge, und das Auftreten von unerwünschten Nebenwirkungen beschrieben [20].

In der einarmigen COMPACT-Studie (COMpliance and Arthralgia in Clinical Therapy) wurden ca. 2000 Patientinnen, die Upfront Anastrozol erhielten, auf einen Zusammenhang zwischen der Nebenwirkung Arthralgie und der Compliance untersucht [21]. Hier konnte ein deutlicher Zusammenhang zwischen dem Auftreten von Arthralgien und der Compliance gefunden werden. In Abhängigkeit von einem Arthralgie-Score (von 0–100) lag die Rate der Non-Compliance bei ca. 10 bis fast 30% [21]. Interessanterweise gab es in dieser Studie einen deutlichen Unterschied zwischen der von den Ärzten angegebenen Compliance und der von den Patientinnen angegebenen. Während die Ärzte die Compli-

**Tab. 5** Assoziation der vom Arzt genannten Einflussgrößen auf die Therapieentscheidung mit den Patientinnengruppen (Gesamtgruppe n = 4672).

| Faktor                   | alle         | adjuvant<br>upfront | adjuvant<br>Jahr 1–5 | adjuvant<br>Jahr 5–10 | metastasiert | p-Wert |
|--------------------------|--------------|---------------------|----------------------|-----------------------|--------------|--------|
| TNM Stadium              | 2 887 (61,8) | 2 616 (62,6)        | 115 (57,5)           | 21 (53,8)             | 135 (53,6)   | 0,012  |
| Hormonrezeptorstatus     | 3 738 (80,0) | 3 386 (81,0)        | 140 (70,0)           | 29 (74,4)             | 183 (72,6)   | <0,001 |
| HER2 Status              | 917 (19,6)   | 865 (20,7)          | 20 (10,0)            | 3 (7,7)               | 29 (11,5)    | <0,001 |
| Art der OP               | 489 (10,5)   | 442 (10,6)          | 17 (8,5)             | 4 (10,3)              | 26 (10,3)    | 0,830  |
| vorausg. Chemotherapien  | 361 (7,7)    | 319 (7,6)           | 7 (3,5)              | 1 (2,6)               | 34 (13,5)    | <0,001 |
| Alter                    | 2 269 (48,6) | 2 088 (49,9)        | 63 (31,5)            | 16 (41,0)             | 102 (40,5)   | <0,001 |
| Patientenmitentscheidung | 1 012 (21,7) | 915 (21,9)          | 35 (17,5)            | 8 (20,5)              | 54 (21,4)    | 0,531  |
| Tumor-Board              | 3 551 (76,0) | 3 249 (77,7)        | 126 (63,0)           | 20 (51,3)             | 156 (61,9)   | <0,001 |

ance nach 9 Monaten bei über 95% schätzten, gaben die Patientinnen weniger als 70% Compliance an.

In einer Studie, die Verschreibungsdatenbanken analysierte, wurde die Rate an Patientinnen, die nach 12 Monaten keine oder keine ausreichende Medikation von Anastrozol zu sich genommen hatten, mit 82 bis 88% angegeben. An dieser Untersuchung nahmen ca. 12 000 Patientinnen teil [18].

Die EvaluateTM-Studie wird ähnlich wie die PACT- und die COM-PACT-Studie Prädiktoren für Compliance untersuchen.

Anders als in den beschriebenen Studien konnten in die EvaluateTM-Studie auch Patientinnen eingebracht werden, die eine fortgeschrittene Erkrankung haben oder die zu einem späteren Zeitpunkt nach der Erkrankung eine Therapie mit dem Aromatasehemmer Letrozol begonnen haben. Hier erscheint die Anzahl von Patientinnen, die nach 5–10 Jahren eine Therapie begonnen haben, relativ niedrig. Für eine Therapie von Letrozol, die nach 5 Jahren Tamoxifen durchgeführt wird, wurde eine Verbesserung des krankheitsfreien Überlebens beschrieben [16]. Für manche Subgruppen, wie die nodalpositiven Patientinnen, wurde sogar ein Benefit in Bezug auf das Gesamtüberleben diskutiert [25, 26]. In der EvaluateTM-Studie waren 35,5% der Patientinnen nodalpositiv. Wenn man davon ausgeht, dass dies der Anteil der Patientinnen ist, denen eine Therapie in der erweiterten adjuvanten Situation angeboten werden könnte, dann erscheint die Zahl von 39 Patientinnen in der EvaluateTM-Studie sehr niedrig. Wahrscheinlich spielen andere Gründe wie ein Bias bei der Rekrutierung oder der zunehmende Einsatz von Aromatasehemmern schon in den ersten 5 Jahren nach der Erkrankung eine Rolle für diese niedrige Zahl. Der Verdacht, dass bei Patientinnen, die von einer solchen Therapie profitieren könnten, nicht diese entsprechende Therapieoption durchgeführt wird, bleibt jedoch bestehen.

Bei den von den Ärzten genannten Faktoren für die Therapieentscheidung wurde klar, dass für die Patientinnen, denen Upfront der Aromatasehemmer verschrieben wurde, deutlich häufiger das Tumorstadium, das Alter der Patientin und der HER2-Status zur Therapieentscheidung herangezogen wurde. Auch wenn die Ursache des Zusammenhangs nicht abgefragt wurde, könnte vermutet werden, dass Patientinnen mit einem höheren Tumorstadium, einem positiven HER2-Status sowie mit einem jüngeren postmenopausalen Alter häufiger der Aromatasehemmer verordnet wurde, um ein höheres Rückfallrisiko abzufangen. Auch erscheint es plausibel, dass bei Entscheidungen direkt nach der Diagnosestellung Tumorboardentscheidungen häufiger eine Rolle spielten als bei Patientinnen, die zu einem späteren Zeitpunkt Letrozol erhielten. Auch wenn der Anteil der Therapieentscheidungen, bei denen die Patientin in die Entscheidungsfindung integriert wird, mit ca. 20% niedrig erscheint, ist die Hinzunahme der Patientin bei der Therapieentscheidung nicht abhängig von der Therapiesituation, was trotz einer niedrigen Rate an Nennungen die Wichtigkeit und Unabhängigkeit dieses Faktors widerspiegeln könnte.

Insgesamt kann die EvaluateTM-Studie einen guten Einblick in das Therapiemanagement, die Compliance und die Nebenwirkungen unter einer Therapie mit Letrozol geben. Alle Patientinnen wurden homogen mit dem Aromatasehemmer Letrozol behandelt, und die Patientinnen und Ärzte wurden prospektiv in Bezug auf die Studienziele (Abb. 1) befragt. Die Studie sollte das Therapie- und Einnahmeverhalten in der klinischen Praxis abbilden.

Geplante Analysen sind die Identifikation von Prädiktoren der Therapieadhärenz und Analysen von Qualitätsparametern des

Therapiemanagements ebenso wie die Auswertung des Informationsbedarfs der Patientinnen und deren Zufriedenheit mit den zur Verfügung gestellten Betreuungsstrukturen und Aufklärungsmaßnahmen.

## Danksagung

Wir danken den Patientinnen und dem beteiligten Studienpersonal. Des Weiteren bei Novartis für die finanzielle Unterstützung bei der Durchführung der Studie und bei der finanziellen Unterstützung für die Publikationskosten. Des Weiteren bedanken wir uns bei den teilnehmenden Studienzentren und Patientinnen, die an der Studie teilgenommen haben. Alle Auswertungen erfolgten unabhängig von Novartis. Ebenso erfolgte die Erstellung dieses Manuskripts unabhängig von Novartis. Die Datenhoheit liegt bei der ärztlichen Studienleitung.

## Interessenkonflikt

P.A.F. erhielt Honorare von folgenden Firmen: Amgen, Roche, Novartis, Pfizer, Genomic Health und erhielt Forschungsgelder von Novartis und Amgen. H.-C.K. erhielt Honorare von Novartis, Amgen, GlaxoSmithKline, Teva, Carl Zeiss Mediatech, Theraclion. M.G. erhielt Honorare von AstraZeneca, Roche, Novartis. S.K. erhielt Honorare von Novartis, Roche, Celgene, TEVA, Amgen. H.T. erhielt Honorare von Novartis. N.H. erhielt Honorare von Novartis. N.F. erhielt Honorare und Forschungsgelder von Novartis. C.T. erhielt Honorare von Novartis, Pfizer und AstraZeneca. R.W. erhielt Honorare und Forschungsgelder von Novartis. E.B. erhielt Honorare von Novartis. K.S., A.J. sind Angestellte von Novartis Pharma.

## Institute

<sup>1</sup> Universitäts-Brustzentrum Franken, Frauenklinik, Universitätsklinikum Erlangen, Friedrich-Alexander Universität Erlangen-Nürnberg, Comprehensive Cancer Center Erlangen-EMN, Erlangen

<sup>2</sup> Universitäts-Frauenklinik Düsseldorf, Düsseldorf

<sup>3</sup> Frauenklinik im Klinikum Dachau, Dachau

<sup>4</sup> Luisenkrankenhaus Düsseldorf, Düsseldorf

<sup>5</sup> Klinikum Pinneberg, Pinneberg

<sup>6</sup> Marienhospital Bottrop, Bottrop

<sup>7</sup> Klinikum Tuttlingen, Tuttlingen

<sup>8</sup> Brustzentrum, Universitäts-Frauenklinik Köln, Köln

<sup>9</sup> Brustzentrum, Klinken der Stadt Köln gGmbH Holweide, Köln

<sup>10</sup> Brustzentrum der Universität München, Frauenkliniken Großhadern und Maistrasse-Innenstadt, München

<sup>11</sup> Vinzenzkrankenhaus Hannover gGmbH, Hannover

<sup>12</sup> Frauenklinik, Klinikum Lüneburg, Lüneburg

<sup>13</sup> Elblandkliniken Meißen-Radebeul Standort Radebeul, Radebeul

<sup>14</sup> Kreiskrankenhaus Böblingen, Böblingen

<sup>15</sup> Universitätsklinik für Frauenheilkunde, Paracelsus Medizinische Privatuniversität, Nürnberg

<sup>16</sup> Frauenklinik des St. Josefsklinik Offenburg, Offenburg

<sup>17</sup> Frauenklinik, Klinikum Bayreuth GmbH, Comprehensive Cancer Center Erlangen-EMN, Bayreuth

<sup>18</sup> Karl-Olga-Krankenhaus, Stuttgart

<sup>19</sup> Medizinisches Zentrum Ulm, Ulm

<sup>20</sup> Klinikum Friedrichshafen, Friedrichshafen

<sup>21</sup> Städtisches Klinikum Neunkirchen Gynäkologie und Geburtshilfe, Neunkirchen

<sup>22</sup> Frauenklinik des Universitätsklinikums Ulm, Ulm

<sup>23</sup> Gynäkologische Praxis in der Kreisklinik, Krumbach

<sup>24</sup> Evangelisches Krankenhaus Ludwigsfelde-Teltow, Ludwigsfelde

<sup>25</sup> Marien-Hospital Wesel, Wesel

<sup>26</sup> Frauenklinik am Kreiskrankenhaus Hameln, Hameln

<sup>27</sup> Landkreis Mittweida Krankenhaus gGmbH, Mittweida

<sup>28</sup> Johanniter Krankenhaus Genthin Stendal gGmbH, Stendal

<sup>29</sup> Praxis Dr. Praetz, Bad Mergentheim

<sup>30</sup> Asklepios Paulinen Klinik Wiesbaden, Wiesbaden

- <sup>31</sup> Frauenklinik, Städtische Kliniken Esslingen a. N., Esslingen
- <sup>32</sup> Frauenklinik Lippe, Lippe
- <sup>33</sup> Frauenklinik, Universitätsklinik Halle Wittenberg, Halle
- <sup>34</sup> Brustzentrum, Kliniken Essen Mitte, Evang. Huyssens-Stiftung/Knappschaft GmbH, Essen
- <sup>35</sup> Kreiskrankenhaus Rendsburg, Rendsburg
- <sup>36</sup> Onkologie Bethanien, Frankfurt
- <sup>37</sup> Universitätsklinikum Schleswig-Holstein Campus Kiel, Kiel
- <sup>38</sup> Novartis Pharma GmbH, Nürnberg
- <sup>39</sup> Clin-Sol GmbH, Würzburg
- <sup>40</sup> Krankenhaus Nordwest, Klinik für Gynäkologie und Geburtshilfe, Frankfurt
- <sup>41</sup> Universitätsfrauenklinik Tübingen, Tübingen

## Literatur

- 1 Lux MP, Maass N, Schutz F et al. Breast cancer 2013 – interpretation of new and known data. *Geburtsh Frauenheilk* 2013; 73: 584–598
- 2 Schutz F, Domschke C, Hennigs A et al. Immunotherapy in breast cancer. *Geburtsh Frauenheilk* 2012; 72: 989–990
- 3 Sinn P, Aulmann S, Wirtz R et al. Multigene assays for classification, prognosis, and prediction in breast cancer: a critical review on the background and clinical utility. *Geburtsh Frauenheilk* 2013; 73: 932–940
- 4 Fersis N, Friedrich M. Reflections after the 35th San Antonio Breast Cancer Symposium. *Geburtsh Frauenheilk* 2013; 73: 262–265
- 5 Eisemann N, Waldmann A, Katalinic A. Epidemiology of breast cancer – current figures and trends. *Geburtsh Frauenheilk* 2013; 73: 130–135
- 6 Coombes RC, Hall E, Gibson LJ et al. A randomized trial of exemestane after two to three years of tamoxifen therapy in postmenopausal women with primary breast cancer. *N Engl J Med* 2004; 350: 1081–1092
- 7 Kaufmann M, Jonat W, Hilfrich J et al. Improved overall survival in postmenopausal women with early breast cancer after anastrozole initiated after treatment with tamoxifen compared with continued tamoxifen: the ARNO 95 Study. *J Clin Oncol* 2007; 25: 2664–2670
- 8 Jakesz R, Jonat W, Gnant M et al. Switching of postmenopausal women with endocrine-responsive early breast cancer to anastrozole after 2 years' adjuvant tamoxifen: combined results of ABCSG trial 8 and ARNO 95 trial. *Lancet* 2005; 366: 455–462
- 9 Regan MM, Neven P, Giobbie-Hurder A et al. Assessment of letrozole and tamoxifen alone and in sequence for postmenopausal women with steroid hormone receptor-positive breast cancer: the BIG 1-98 randomised clinical trial at 8.1 years median follow-up. *Lancet Oncol* 2011; 12: 1101–1108
- 10 Thurlimann B, Keshaviah A, Coates AS et al. A comparison of letrozole and tamoxifen in postmenopausal women with early breast cancer. *N Engl J Med* 2005; 353: 2747–2757
- 11 Howell A, Cuzick J, Baum M et al. Results of the ATAC (Arimidex, Tamoxifen, Alone or in Combination) trial after completion of 5 years' adjuvant treatment for breast cancer. *Lancet* 2005; 365: 60–62
- 12 Baum M, Budzar AU, Cuzick J et al. Anastrozole alone or in combination with tamoxifen versus tamoxifen alone for adjuvant treatment of postmenopausal women with early breast cancer: first results of the ATAC randomised trial. *Lancet* 2002; 359: 2131–2139
- 13 Pagani O, Regan MM, Walley BA et al. Adjuvant exemestane with ovarian suppression in premenopausal breast cancer. *N Engl J Med* 2014; 371: 107–118
- 14 Jakesz R, Greil R, Gnant M et al. Extended adjuvant therapy with anastrozole among postmenopausal breast cancer patients: results from the randomized Austrian Breast and Colorectal Cancer Study Group Trial 6a. *J Natl Cancer Inst* 2007; 99: 1845–1853
- 15 Mamounas EP, Jeong JH, Wickerham DL et al. Benefit from exemestane as extended adjuvant therapy after 5 years of adjuvant tamoxifen: intention-to-treat analysis of the National Surgical Adjuvant Breast And Bowel Project B-33 trial. *J Clin Oncol* 2008; 26: 1965–1971
- 16 Goss PE, Ingle JN, Martino S et al. A randomized trial of letrozole in postmenopausal women after five years of tamoxifen therapy for early-stage breast cancer. *N Engl J Med* 2003; 349: 1793–1802
- 17 Ward JH. Duration of adjuvant endocrine therapy of breast cancer: how much is enough? *Curr Opin Obstet Gynecol* 2010; 22: 51–55
- 18 Partridge AH, LaFountain A, Mayer E et al. Adherence to initial adjuvant anastrozole therapy among women with early-stage breast cancer. *J Clin Oncol* 2008; 26: 556–562
- 19 Ziller V, Kalder M, Albert US et al. Adherence to adjuvant endocrine therapy in postmenopausal women with breast cancer. *Ann Oncol* 2009; 20: 431–436
- 20 Hadji P, Blettner M, Harbeck N et al. The Patient's Anastrozole Compliance to Therapy (PACT) Program: a randomized, in-practice study on the impact of a standardized information program on persistence and compliance to adjuvant endocrine therapy in postmenopausal women with early breast cancer. *Ann Oncol* 2013; 24: 1505–1512
- 21 Hadji P, Jackisch C, Bolten W et al. COMPLIANCE and Arthralgia in Clinical Therapy: the COMPACT trial, assessing the incidence of arthralgia, and compliance within the first year of adjuvant anastrozole therapy. *Ann Oncol* 2014; 25: 372–377
- 22 Ma AM, Barone J, Wallis AE et al. Noncompliance with adjuvant radiation, chemotherapy, or hormonal therapy in breast cancer patients. *Am J Surg* 2008; 196: 500–504
- 23 Geller BM, Kerlikowske K, Carney PA et al. Mammography surveillance following breast cancer. *Breast Cancer Res Treat* 2003; 81: 107–115
- 24 Harbeck N, Blettner M, Hadji P et al. Patient's Anastrozole Compliance to Therapy (PACT) Program: baseline data and patient characteristics from a population-based, randomized study evaluating compliance to aromatase inhibitor therapy in postmenopausal women with hormone-sensitive early breast cancer. *Breast Care (Basel)* 2013; 8: 110–120
- 25 Goss PE, Ingle JN, Martino S et al. Randomized trial of letrozole following tamoxifen as extended adjuvant therapy in receptor-positive breast cancer: updated findings from NCIC CTG MA.17. *J Natl Cancer Inst* 2005; 97: 1262–1271
- 26 Goss PE, Muss HB, Ingle JN et al. Extended adjuvant endocrine therapy in breast cancer: current status and future directions. *Clin Breast Cancer* 2008; 8: 411–417
